# Supplementary material for: Crystal structure, coloring problem and magnetism of Gd5−xZrxSi4
Source: Royal Society of Chemistry journal article supplement (doi:10.1039/c0dt01821j), 2011-01-01
Supplement: c0dt01821j.pdf [file c0dt01821j.pdf]

## **SUPPLEMENTARY DATA**

### **Crystal structure, coloring problem and magnetism of $\text{Gd}_{5-x}\text{Zr}_x\text{Si}_4$**

Jinlei Yao, Pavlo Lyutyy, and Yuriy Mozharivskyj  
Department of Chemistry, McMaster University, Hamilton, Ontario L8S 4M1, Canada

**Table S1.** -ICOHP (eV/cell) at the Fermi level for the orthorhombic Gd<sub>5</sub>Si<sub>4</sub> and hypothetical Gd<sub>4</sub>ZrSi<sub>4</sub> phase (number of equivalent bonds is given in parentheses)

| Bonds         | Gd <sub>5</sub> Si <sub>4</sub> |                          | Gd <sub>4</sub> ZrSi <sub>4</sub> ( <b>O3</b> ) |                          |
|---------------|---------------------------------|--------------------------|-------------------------------------------------|--------------------------|
|               | Distance (Å)                    | -ICOHP (E <sub>F</sub> ) | Distance (Å)                                    | -ICOHP (E <sub>F</sub> ) |
| Si1-Si1 (× 4) | 2.507(3)                        | 2.344                    | 2.518(2)                                        | 2.273                    |
| Si2-Si3 (× 4) | 2.511(3)                        | 2.367                    | 2.510(2)                                        | 2.281                    |
| M1-Si1 (× 8)  | 3.067(2)                        | 1.341                    | 3.013(1)                                        | 1.323                    |
| -Si1 (× 8)    | 3.103(2)                        | 1.052                    | 3.065(1)                                        | 1.020                    |
| -Si1 (× 8)    | 3.157(2)                        | 1.056                    | 3.113(1)                                        | 1.067                    |
| -Si1 (× 8)    | 3.726(2)                        | 0.514                    | 3.602(1)                                        | 0.594                    |
| -Si2 (× 8)    | 3.180(2)                        | 0.996                    | 3.131(1)                                        | 0.973                    |
| -Si3 (× 8)    | 3.143(2)                        | 1.122                    | 3.077(1)                                        | 1.083                    |
| -Si3 (× 8)    | 3.163(2)                        | 0.990                    | 3.109(1)                                        | 0.968                    |
| M2-Si1 (× 8)  | 2.887(2)                        | 1.682                    | 2.822(1)                                        | 1.673                    |
| -Si1 (× 8)    | 2.905(2)                        | 1.469                    | 2.848(1)                                        | 1.473                    |
| -Si1 (× 8)    | 2.995(2)                        | 1.201                    | 2.929(1)                                        | 1.203                    |
| -Si2 (× 8)    | 2.972(2)                        | 1.413                    | 2.897(1)                                        | 1.384                    |
| -Si2 (× 8)    | 2.977(2)                        | 1.275                    | 2.913(1)                                        | 1.265                    |
| -Si3 (× 8)    | 3.058(2)                        | 1.134                    | 2.992(1)                                        | 1.099                    |
| M3-Si1 (× 8)  | 3.125(2)                        | 1.059                    | 3.057(1)                                        | 1.663                    |
| -Si2 (× 4)    | 2.957(2)                        | 1.388                    | 2.902(1)                                        | 2.072                    |
| -Si2 (× 4)    | 3.329(2)                        | 0.774                    | 3.217(1)                                        | 1.306                    |
| -Si3 (× 4)    | 2.958(2)                        | 1.352                    | 2.912(1)                                        | 2.069                    |
| -Si3 (× 4)    | 3.020(2)                        | 1.272                    | 2.956(1)                                        | 1.935                    |
| M1-M1 (× 8)   | 3.8986(3)                       | 0.322                    | 3.8347(3)                                       | 0.301                    |
| -M1 (× 4)     | 4.0661(6)                       | 0.466                    | 3.9607(3)                                       | 0.450                    |
| -M2 (× 8)     | 3.7751(5)                       | 0.439                    | 3.6816(3)                                       | 0.428                    |
| -M2 (× 8)     | 3.8454(5)                       | 0.399                    | 3.7512(3)                                       | 0.385                    |
| -M2 (× 8)     | 3.9012(5)                       | 0.395                    | 3.8565(3)                                       | 0.360                    |
| -M2 (× 8)     | 4.0587(5)                       | 0.220                    | 3.9851(3)                                       | 0.210                    |
| -M2 (× 8)     | 4.0961(5)                       | 0.298                    | 4.0133(3)                                       | 0.274                    |
| -M3 (× 8)     | 3.5300(4)                       | 0.389                    | 3.4773(3)                                       | 0.642                    |
| -M3 (× 8)     | 3.5856(5)                       | 0.388                    | 3.5171(3)                                       | 0.642                    |
| M2-M2 (× 4)   | 3.7793(7)                       | 0.309                    | 3.7043(4)                                       | 0.274                    |
| -M2 (× 8)     | 3.9093(5)                       | 0.333                    | 3.8430(3)                                       | 0.298                    |
| -M3 (× 8)     | 3.4487(5)                       | 0.493                    | 3.3767(3)                                       | 0.728                    |
| -M3 (× 8)     | 3.4499(4)                       | 0.461                    | 3.3777(3)                                       | 0.770                    |

**Table S2.** -ICOHP (eV/cell) at the Fermi level for various models of Zr<sub>5</sub>Si<sub>4</sub>-type Gd<sub>4</sub>ZrSi<sub>4</sub> (number of equivalent bonds is given in parentheses)

| Bonds         | Distance (Å) | -ICOHP (E <sub>F</sub> )               |                                        |                                        |
|---------------|--------------|----------------------------------------|----------------------------------------|----------------------------------------|
|               |              | Gd <sub>4</sub> ZrSi <sub>4</sub> (T1) | Gd <sub>4</sub> ZrSi <sub>4</sub> (T2) | Gd <sub>4</sub> ZrSi <sub>4</sub> (T3) |
| Si1-Si2 (× 8) | 2.535(9)     | 2.178                                  | 2.151                                  | 2.213                                  |
| M1-Si1 (× 8)  | 2.989(7)     | 1.722                                  | 1.379                                  | 1.407                                  |
| -Si1 (× 8)    | 3.107(7)     | 1.244                                  | 0.981                                  | 0.986                                  |
| -Si1 (× 8)    | 3.150(8)     | 1.254                                  | 0.955                                  | 1.021                                  |
| -Si1 (× 8)    | 3.559(6)     | 0.768                                  | 0.594                                  | 0.640                                  |
| -Si2 (× 8)    | 3.064(7)     | 1.351                                  | 1.076                                  | 1.053                                  |
| -Si2 (× 8)    | 3.078(6)     | 1.457                                  | 1.117                                  | 1.087                                  |
| -Si2 (× 8)    | 3.222(7)     | 1.112                                  | 0.842                                  | 0.845                                  |
| M2-Si1 (× 8)  | 2.820(8)     | 1.608                                  | 2.036                                  | 1.633                                  |
| -Si1 (× 8)    | 2.824(8)     | 1.429                                  | 1.861                                  | 1.514                                  |
| -Si1 (× 8)    | 2.954(6)     | 1.153                                  | 1.428                                  | 1.145                                  |
| -Si2 (× 8)    | 2.881(7)     | 1.422                                  | 1.778                                  | 1.354                                  |
| -Si2 (× 8)    | 2.898(6)     | 1.276                                  | 1.580                                  | 1.223                                  |
| -Si2 (× 8)    | 2.969(7)     | 1.143                                  | 1.459                                  | 1.109                                  |
| M3-Si1 (× 8)  | 3.097(8)     | 0.987                                  | 0.977                                  | 1.582                                  |
| -Si2 (× 8)    | 2.927(6)     | 1.307                                  | 1.296                                  | 2.025                                  |
| -Si2 (× 8)    | 3.015(7)     | 1.153                                  | 1.132                                  | 1.795                                  |
| M1-M1 (× 8)   | 3.832(1)     | 0.498                                  | 0.330                                  | 0.325                                  |
| -M1 (× 4)     | 3.933(2)     | 0.708                                  | 0.418                                  | 0.438                                  |
| -M2 (× 8)     | 3.688(2)     | 0.540                                  | 0.550                                  | 0.431                                  |
| -M2 (× 8)     | 3.709(2)     | 0.515                                  | 0.532                                  | 0.391                                  |
| -M2 (× 8)     | 3.868(2)     | 0.422                                  | 0.429                                  | 0.338                                  |
| -M2 (× 8)     | 3.969(2)     | 0.368                                  | 0.376                                  | 0.280                                  |
| -M2 (× 8)     | 4.021(2)     | 0.237                                  | 0.244                                  | 0.180                                  |
| -M2 (× 8)     | 4.106(2)     | 0.213                                  | 0.219                                  | 0.156                                  |
| -M3 (× 8)     | 3.544(1)     | 0.502                                  | 0.386                                  | 0.632                                  |
| -M3 (× 8)     | 3.548(2)     | 0.486                                  | 0.366                                  | 0.597                                  |
| M2-M2 (× 4)   | 3.754(2)     | 0.332                                  | 0.518                                  | 0.320                                  |
| -M2 (× 8)     | 3.879(2)     | 0.264                                  | 0.432                                  | 0.270                                  |
| -M3 (× 8)     | 3.330(2)     | 0.459                                  | 0.588                                  | 0.723                                  |
| -M3 (× 8)     | 3.348(2)     | 0.472                                  | 0.599                                  | 0.742                                  |
